# Supplementary material
Source: HighWire-hosted journal article supplement (https://www.cmaj.ca/highwire/filestream/58992/field_highwire_adjunct_files/4/sleep-topfner-5-at.pdf)
Supplement: sleep-topfner-5-at.pdf [file sleep-topfner-5-at.pdf]

**Appendix 5 (as supplied by the authors): Diagnostic accuracy parameters reported in included studies**

| Study                                                     | Diagnostic Accuracy Measure | Sleep Study Apnea-Hypopnea Index Cut-off |       |        |        |        |        |        |        |
|-----------------------------------------------------------|-----------------------------|------------------------------------------|-------|--------|--------|--------|--------|--------|--------|
|                                                           |                             | ≤5/hr                                    | ≥5/hr | ≥10/hr | ≥15/hr | ≥20/hr | ≥25/hr | ≥30/hr | ≥50/hr |
| <b>Simultaneous and Separate studies</b>                  |                             |                                          |       |        |        |        |        |        |        |
| Abraham et al. <sup>(1)</sup><br>(2006)<br><br>At-home    | Sensitivity                 | -                                        | 95.2% | 88.2%  | 67%    | -      | -      | -      | -      |
|                                                           | Specificity                 | -                                        | 52.2% | 63.0%  | 78%    | -      | -      | -      | -      |
|                                                           | PPV                         | -                                        | 64.5% | 60.0%  | 53.3%  | -      | -      | -      | -      |
|                                                           | NPV                         | -                                        | 92.3% | 89.5%  | 86.2%  | -      | -      | -      | -      |
|                                                           | LR+                         | -                                        | 1.99  | 2.38   | 3.04   | -      | -      | -      | -      |
|                                                           | LR-                         | -                                        | 0.09  | 0.19   | 0.423  | -      | -      | -      | -      |
|                                                           | T+                          | -                                        | 20    | 15     | 8      | -      | -      | -      | -      |
|                                                           | T-                          | -                                        | 12    | 17     | 25     | -      | -      | -      | -      |
|                                                           | F+                          | -                                        | 11    | 10     | 7      | -      | -      | -      | -      |
|                                                           | F-                          | -                                        | 1     | 2      | 4      | -      | -      | -      | -      |
|                                                           | Prevalence                  | -                                        | -     | -      | -      | -      | -      | -      | -      |
|                                                           | Accuracy                    | -                                        | 73%   | 73%    | 73%    | -      | -      | -      | -      |
| AUC                                                       | -                           | -                                        | -     | -      | -      | -      | -      | -      |        |
| Ayappa et al. <sup>(2)</sup><br>(2008)<br><br>At-home     | Sensitivity                 | -                                        | 92.0% | 89.0%  | 76.0%  | -      | -      | -      | -      |
|                                                           | Specificity                 | -                                        | 67.0% | 72.0%  | 82.0%  | -      | -      | -      | -      |
|                                                           | PPV                         | -                                        | 88.0% | 77.0%  | 81.0%  | -      | -      | -      | -      |
|                                                           | NPV                         | -                                        | 75.0% | 85.0%  | 78.0%  | -      | -      | -      | -      |
|                                                           | LR+                         | -                                        | 2.76  | 3.15   | 4.29   | -      | -      | -      | -      |
|                                                           | LR-                         | -                                        | 0.12  | 0.16   | 0.30   | -      | -      | -      | -      |
|                                                           | T+                          | -                                        | 45    | 13     | 25     | -      | -      | -      | -      |
|                                                           | T-                          | -                                        | 12    | 23     | 8      | -      | -      | -      | -      |
|                                                           | F+                          | -                                        | 6     | 9      | 6      | -      | -      | -      | -      |
|                                                           | F-                          | -                                        | 4     | 4      | 8      | -      | -      | -      | -      |
|                                                           | Prevalence                  | -                                        | -     | -      | -      | -      | -      | -      | -      |
|                                                           | Accuracy                    | -                                        | -     | -      | -      | -      | -      | -      | -      |
| AUC                                                       | -                           | -                                        | -     | -      | -      | -      | -      | -      |        |
| Ayappa et al. <sup>(2)</sup><br>2008<br><br>In-lab        | Sensitivity                 | -                                        | 98.0% | 97.0%  | 91.0%  | -      | -      | -      | -      |
|                                                           | Specificity                 | -                                        | 76%   | 78.0%  | 92.0%  | -      | -      | -      | -      |
|                                                           | PPV                         | -                                        | 91.0% | 82.0%  | 92.0%  | -      | -      | -      | -      |
|                                                           | NPV                         | -                                        | 94.0% | 96.0%  | 92.0%  | -      | -      | -      | -      |
|                                                           | LR+                         | -                                        | 4.12  | 4.38   | 11.85  | -      | -      | -      | -      |
|                                                           | LR-                         | -                                        | 0.03  | 0.03   | 0.10   | -      | -      | -      | -      |
|                                                           | T+                          | -                                        | 51    | 36     | 31     | -      | -      | -      | -      |
|                                                           | T-                          | -                                        | 16    | 28     | 36     | -      | -      | -      | -      |
|                                                           | F+                          | -                                        | 5     | 8      | 3      | -      | -      | -      | -      |
|                                                           | F-                          | -                                        | 1     | 1      | 3      | -      | -      | -      | -      |
|                                                           | Prevalence                  | -                                        | 71%   | 51%    | 47%    | -      | -      | -      | -      |
|                                                           | Accuracy                    | -                                        | 92%   | 87.6%  | 91.7%  | -      | -      | -      | -      |
| AUC                                                       | -                           | -                                        | -     | -      | -      | -      | -      | -      |        |
| Garcia-Diaz et al. <sup>(3)</sup><br>(2007)<br><br>In-lab | Sensitivity                 | -                                        | -     | 94.6%  | 100%   | -      | -      | 95.8%  | -      |
|                                                           | Specificity                 | -                                        | -     | 96.0%  | 96.7%  | -      | -      | 94.7%  | -      |
|                                                           | PPV                         | -                                        | -     | 97.0%  | 97.0%  | -      | -      | 92.0%  | -      |
|                                                           | NPV                         | -                                        | -     | 92.0%  | 100%   | -      | -      | 97.0%  | -      |
|                                                           | LR+                         | -                                        | -     | 23.64  | 30     | -      | -      | 18.2   | -      |
|                                                           | LR-                         | -                                        | -     | 0.06   | -      | -      | -      | 0.04   | -      |
|                                                           | T+                          | -                                        | -     | 34     | 32     | -      | -      | 23     | -      |
|                                                           | T-                          | -                                        | -     | 25     | 29     | -      | -      | 36     | -      |
|                                                           | F+                          | -                                        | -     | 1      | 1      | -      | -      | 2      | -      |
|                                                           | F-                          | -                                        | -     | 2      | 0      | -      | -      | 1      | -      |
|                                                           | Prevalence                  | -                                        | -     | 58%    | 51%    | -      | -      | 39%    | -      |
|                                                           | Accuracy                    | -                                        | -     | 95%    | 98%    | -      | -      | 95%    | -      |

Appendix to: El Shayeb M, Topfer LA, Stafinski T, et al. A comparison of level 3 portable sleep tests to level 1 polysomnography in the diagnosis of sleep-disordered breathing: a systematic review and meta-analysis. *CMAJ* 2013; DOI:10.1503/cmaj.130952. Copyright © 2013 Canadian Medical Association or its licensors

| Study                                                  | Diagnostic Accuracy Measure | Sleep Study Apnea-Hypopnea Index Cut-off |          |          |          |        |        |        |        |
|--------------------------------------------------------|-----------------------------|------------------------------------------|----------|----------|----------|--------|--------|--------|--------|
|                                                        |                             | ≤5/hr                                    | ≥5/hr    | ≥10/hr   | ≥15/hr   | ≥20/hr | ≥25/hr | ≥30/hr | ≥50/hr |
|                                                        | AUC                         | -                                        | -        | 0.97     | 0.99     | -      | -      | 0.98   | -      |
| Garcia-Diaz et al. <sup>(3)</sup><br>(2007)<br>At-home | Sensitivity                 | -                                        | -        | 86.4%    | 87.5%    | -      | -      | 91.7%  | -      |
|                                                        | Specificity                 | -                                        | -        | 100%     | 96.7%    | -      | -      | 94.7%  | -      |
|                                                        | PPV                         | -                                        | -        | 100%     | 97.0%    | -      | -      | 92.0%  | -      |
|                                                        | NPV                         | -                                        | -        | 84.0%    | 88.0%    | -      | -      | 95.0%  | -      |
|                                                        | LR+                         | -                                        | -        | Infinity | 27.0     | -      | -      | 17.0   | -      |
|                                                        | LR-                         | -                                        | -        | 0.14     | 0.13     | -      | -      | 0.09   | -      |
|                                                        | T+                          | -                                        | -        | -        | 30       | -      | -      | 23     | -      |
|                                                        | T-                          | -                                        | -        | -        | 27       | -      | -      | 35     | -      |
|                                                        | F+                          | -                                        | -        | -        | 1        | -      | -      | 2      | -      |
|                                                        | F-                          | -                                        | -        | -        | 4        | -      | -      | 2      | -      |
|                                                        | Prevalence                  | -                                        | -        | -        | 55%      | -      | -      | 40%    | -      |
| Accuracy                                               | -                           | -                                        | -        | 91.6%    | -        | -      | 93%    | -      |        |
| AUC                                                    | -                           | -                                        | 0.97     | 0.97     | -        | -      | 0.98   | -      |        |
| Kuna et al. <sup>(4)</sup><br>(2005)<br>At-home        | Sensitivity                 | -                                        | -        | -        | 86.7%    | -      | -      | -      | -      |
|                                                        | Specificity                 | -                                        | -        | -        | 77.8%    | -      | -      | -      | -      |
|                                                        | PPV                         | -                                        | -        | -        | 93.0%    | -      | -      | -      | -      |
|                                                        | NPV                         | -                                        | -        | -        | 64.0%    | -      | -      | -      | -      |
|                                                        | LR+                         | -                                        | -        | -        | 3.90     | -      | -      | -      | -      |
|                                                        | LR-                         | -                                        | -        | -        | 0.17     | -      | -      | -      | -      |
|                                                        | T+                          | -                                        | -        | -        | -        | -      | -      | -      | -      |
|                                                        | T-                          | -                                        | -        | -        | -        | -      | -      | -      | -      |
|                                                        | F+                          | -                                        | -        | -        | -        | -      | -      | -      | -      |
|                                                        | F-                          | -                                        | -        | -        | -        | -      | -      | -      | -      |
|                                                        | Prevalence                  | -                                        | -        | -        | -        | -      | -      | -      | -      |
| Accuracy                                               | -                           | -                                        | -        | -        | -        | -      | -      | -      |        |
| AUC                                                    | -                           | -                                        | -        | -        | -        | -      | -      | -      |        |
| Kuna et al. <sup>(4)</sup><br>(2005)<br>In-lab         | Sensitivity                 | -                                        | -        | -        | 96.6%    | -      | -      | -      | -      |
|                                                        | Specificity                 | -                                        | -        | -        | 100%     | -      | -      | -      | -      |
|                                                        | PPV                         | -                                        | -        | -        | -        | -      | -      | -      | -      |
|                                                        | NPV                         | -                                        | -        | -        | -        | -      | -      | -      | -      |
|                                                        | LR+                         | -                                        | -        | -        | -        | -      | -      | -      | -      |
|                                                        | LR-                         | -                                        | -        | -        | 0.03     | -      | -      | -      | -      |
|                                                        | T+                          | -                                        | -        | -        | -        | -      | -      | -      | -      |
|                                                        | T-                          | -                                        | -        | -        | -        | -      | -      | -      | -      |
|                                                        | F+                          | -                                        | -        | -        | -        | -      | -      | -      | -      |
|                                                        | F-                          | -                                        | -        | -        | -        | -      | -      | -      | -      |
|                                                        | Prevalence                  | -                                        | -        | -        | -        | -      | -      | -      | -      |
| Accuracy                                               | -                           | -                                        | -        | -        | -        | -      | -      | -      |        |
| AUC                                                    | -                           | -                                        | -        | -        | -        | -      | -      | -      |        |
| Polese et al. <sup>(5)</sup><br>(2009)<br>In-lab       | Sensitivity                 | -                                        | 93.9%    | -        | 96.2%    | -      | -      | 93.7%  | -      |
|                                                        | Specificity                 | -                                        | 100%     | -        | 100%     | -      | -      | 78.9%  | -      |
|                                                        | PPV                         | -                                        | 100%     | -        | 100%     | -      | -      | 71%    | -      |
|                                                        | NPV                         | -                                        | 59.0%    | -        | 91.0%    | -      | -      | 92%    | -      |
|                                                        | LR+                         | -                                        | Infinity | -        | Infinity | -      | -      | 4.44   | -      |
|                                                        | LR-                         | -                                        | 0.061    | -        | 0.038    | -      | -      | 0.08   | -      |
|                                                        | T+                          | -                                        | -        | -        | -        | -      | -      | -      | -      |
|                                                        | T-                          | -                                        | -        | -        | -        | -      | -      | -      | -      |
|                                                        | F+                          | -                                        | -        | -        | -        | -      | -      | -      | -      |
|                                                        | F-                          | -                                        | -        | -        | -        | -      | -      | -      | -      |
|                                                        | Prevalence                  | -                                        | -        | -        | -        | -      | -      | -      | -      |
| Accuracy                                               | -                           | -                                        | -        | -        | -        | -      | -      | -      |        |
| AUC                                                    | -                           | -                                        | -        | -        | -        | -      | -      | -      |        |
| Santos-Silva et al. <sup>(6)</sup>                     | Sensitivity                 | -                                        | 98.0%    | -        | 97.0%    | -      | -      | 96.0%  | -      |
|                                                        | Specificity                 | -                                        | 62.0%    | -        | 74.0%    | -      | -      | 92.0%  | -      |

Appendix to: El Shayeb M, Topfer LA, Stafinski T, et al. A comparison of level 3 portable sleep tests to level 1 polysomnography in the diagnosis of sleep-disordered breathing: a systematic review and meta-analysis. *CMAJ* 2013; DOI:10.1503/cmaj.130952. Copyright © 2013 Canadian Medical Association or its licensors

| Study                                                          | Diagnostic Accuracy Measure | Sleep Study Apnea-Hypopnea Index Cut-off |        |        |        |        |        |        |        |
|----------------------------------------------------------------|-----------------------------|------------------------------------------|--------|--------|--------|--------|--------|--------|--------|
|                                                                |                             | ≤5/hr                                    | ≥5/hr  | ≥10/hr | ≥15/hr | ≥20/hr | ≥25/hr | ≥30/hr | ≥50/hr |
| (2009)<br>In-lab                                               | PPV                         | -                                        | 87.0%  | -      | 78.0%  | -      | -      | 87.0%  | -      |
|                                                                | NPV                         | -                                        | 93.0%  | -      | 96.0%  | -      | -      | 98.0%  | -      |
|                                                                | LR+                         | -                                        | 2.58   | -      | 3.73   | -      | -      | 12.0   | -      |
|                                                                | LR-                         | -                                        | 0.032  | -      | 0.041  | -      | -      | 0.043  | -      |
|                                                                | T+                          | -                                        | 57     | -      | 38     | -      | -      | 28     | -      |
|                                                                | T-                          | -                                        | 14     | -      | 30     | -      | -      | 47     | -      |
|                                                                | F+                          | -                                        | 8      | -      | 11     | -      | -      | 4      | -      |
|                                                                | F-                          | -                                        | 1      | -      | 1      | -      | -      | 1      | -      |
|                                                                | Prevalence                  | -                                        | 72%    | -      | 49%    | -      | -      | 36%    | -      |
|                                                                | Accuracy                    | -                                        | 88%    | -      | 85%    | -      | -      | 93%    | -      |
| AUC                                                            | -                           | 0.97                                     | -      | 0.98   | -      | -      | 0.98   | -      |        |
| Santos-Silva et al. <sup>(6)</sup><br>(2009)<br>At-home        | Sensitivity                 | -                                        | 93.0%  | -      | 85.0%  | -      | -      | 77.0%  | -      |
|                                                                | Specificity                 | -                                        | 59.0%  | -      | 80.0%  | -      | -      | 93.0%  | -      |
|                                                                | PPV                         | -                                        | 85.0%  | -      | 80.0%  | -      | -      | 81.0%  | -      |
|                                                                | NPV                         | -                                        | 76.0%  | -      | 84.0%  | -      | -      | 91.0%  | -      |
|                                                                | LR+                         | -                                        | 2.27   | -      | 4.25   | -      | -      | 11.0   | -      |
|                                                                | LR-                         | -                                        | 0.12   | -      | 0.19   | -      | -      | 0.25   | -      |
|                                                                | T+                          | -                                        | 53     | -      | 33     | -      | -      | 17     | -      |
|                                                                | T-                          | -                                        | 14     | -      | 33     | -      | -      | 54     | -      |
|                                                                | F+                          | -                                        | 9      | -      | 8      | -      | -      | 4      | -      |
|                                                                | F-                          | -                                        | 4      | -      | 6      | -      | -      | 5      | -      |
| Prevalence                                                     | -                           | 71.4%                                    | -      | 48.5%  | -      | -      | 28%    | -      |        |
| Accuracy                                                       | -                           | 83%                                      | -      | 82%    | -      | -      | 88.5%  | -      |        |
| AUC                                                            | -                           | 0.90                                     | -      | 0.92   | -      | -      | 0.95   | -      |        |
| Smith et al. <sup>(7)</sup><br>(2007)<br>At-home               | Sensitivity                 | -                                        | -      | -      | 58.3%  | -      | -      | -      | -      |
|                                                                | Specificity                 | -                                        | -      | -      | 62.5%  | -      | -      | -      | -      |
|                                                                | PPV                         | -                                        | -      | -      | 70.0%  | -      | -      | -      | -      |
|                                                                | NPV                         | -                                        | -      | -      | 50.0%  | -      | -      | -      | -      |
|                                                                | LR+                         | -                                        | -      | -      | 1.55   | -      | -      | -      | -      |
|                                                                | LR-                         | -                                        | -      | -      | 0.67   | -      | -      | -      | -      |
|                                                                | T+                          | -                                        | -      | -      | -      | -      | -      | -      | -      |
|                                                                | T-                          | -                                        | -      | -      | -      | -      | -      | -      | -      |
|                                                                | F+                          | -                                        | -      | -      | -      | -      | -      | -      | -      |
|                                                                | F-                          | -                                        | -      | -      | -      | -      | -      | -      | -      |
| Prevalence                                                     | -                           | -                                        | -      | -      | -      | -      | -      | -      |        |
| Accuracy                                                       | -                           | -                                        | -      | -      | -      | -      | -      | -      |        |
| AUC                                                            | -                           | -                                        | -      | -      | -      | -      | -      | -      |        |
| Tonelli de Oliveria et al. <sup>(8)</sup><br>(2009)<br>At-home | Sensitivity                 | -                                        | 96.15% | 90.7%  | 81.3%  | -      | -      | 80.0%  | -      |
|                                                                | Specificity                 | -                                        | 64.7%  | 82.9%  | 82.6%  | -      | -      | 92.1%  | -      |
|                                                                | PPV                         | -                                        | 94.3%  | 92.9%  | 88.4%  | -      | -      | 85.7%  | -      |
|                                                                | NPV                         | -                                        | 73.3%  | 68.4%  | 73.1%  | -      | -      | 88.6%  | -      |
|                                                                | LR+                         | -                                        | 2.7    | 5.2    | 4.6    | -      | -      | 10.1   | -      |
|                                                                | LR-                         | -                                        | 0.05   | 0.11   | 0.22   | -      | -      | 0.21   | -      |
|                                                                | T+                          | -                                        | 100    | 78     | 55     | -      | -      | 36     | -      |
|                                                                | T-                          | -                                        | 11     | 29     | 44     | -      | -      | 70     | -      |
|                                                                | F+                          | -                                        | 6      | 6      | 9      | -      | -      | 6      | -      |
|                                                                | F-                          | -                                        | 4      | 8      | 13     | -      | -      | 9      | -      |
| Prevalence                                                     | -                           | 85%                                      | 70%    | 52%    | -      | -      | 37%    | -      |        |
| Accuracy                                                       | -                           | 92%                                      | 88%    | 82%    | -      | -      | 88%    | -      |        |
| AUC                                                            | -                           | 0.96                                     | 0.92   | 0.91   | -      | -      | 0.92   | -      |        |
| Tonelli de Oliveria et al. <sup>(8)</sup><br>(2009)<br>In-lab  | Sensitivity                 | 95.3%                                    | -      | -      | -      | -      | -      | -      | -      |
|                                                                | Specificity                 | 75.0%                                    | -      | -      | -      | -      | -      | -      | -      |
|                                                                | PPV                         | -                                        | -      | -      | -      | -      | -      | -      | -      |
|                                                                | NPV                         | -                                        | -      | -      | -      | -      | -      | -      | -      |
|                                                                | LR+                         | 3.81                                     | -      | -      | -      | -      | -      | -      | -      |

Appendix to: El Shayeb M, Topfer LA, Stafinski T, et al. A comparison of level 3 portable sleep tests to level 1 polysomnography in the diagnosis of sleep-disordered breathing: a systematic review and meta-analysis. *CMAJ* 2013; DOI:10.1503/cmaj.130952. Copyright © 2013 Canadian Medical Association or its licensors

| Study                                            | Diagnostic Accuracy Measure | Sleep Study Apnea-Hypopnea Index Cut-off |       |        |          |        |        |          |        |
|--------------------------------------------------|-----------------------------|------------------------------------------|-------|--------|----------|--------|--------|----------|--------|
|                                                  |                             | ≤5/hr                                    | ≥5/hr | ≥10/hr | ≥15/hr   | ≥20/hr | ≥25/hr | ≥30/hr   | ≥50/hr |
|                                                  | LR-                         | 0.06                                     | -     | -      | -        | -      | -      | -        | -      |
|                                                  | T+                          | -                                        | -     | -      | -        | -      | -      | -        | -      |
|                                                  | T-                          | -                                        | -     | -      | -        | -      | -      | -        | -      |
|                                                  | F+                          | -                                        | -     | -      | -        | -      | -      | -        | -      |
|                                                  | F-                          | -                                        | -     | -      | -        | -      | -      | -        | -      |
|                                                  | Prevalence                  | -                                        | -     | -      | -        | -      | -      | -        | -      |
|                                                  | Accuracy                    | -                                        | -     | -      | -        | -      | -      | -        | -      |
|                                                  | AUC                         | -                                        | -     | -      | -        | -      | -      | -        | -      |
| <b>Simultaneous studies</b>                      |                             |                                          |       |        |          |        |        |          |        |
| Amir et al. <sup>(9)</sup><br>(2010)             | Sensitivity                 | -                                        | 97.2% | -      | 100%     | -      | -      | -        | -      |
|                                                  | Specificity                 | -                                        | 94.1% | -      | 92.7%    | -      | -      | -        | -      |
|                                                  | PPV                         | -                                        | 92%   | -      | 80%      | -      | -      | -        | -      |
|                                                  | NPV                         | -                                        | 94%   | -      | 100%     | -      | -      | -        | -      |
|                                                  | LR+                         | -                                        | 16.47 | -      | 1.66     | -      | -      | -        | -      |
|                                                  | LR-                         | -                                        | 0.029 | -      | infinity | -      | -      | -        | -      |
|                                                  | T+                          | -                                        | 35    | -      | 12       | -      | -      | -        | -      |
|                                                  | T-                          | -                                        | 16    | -      | 38       | -      | -      | -        | -      |
|                                                  | F+                          | -                                        | 1     | -      | 3        | -      | -      | -        | -      |
|                                                  | F-                          | -                                        | 1     | -      | 0        | -      | -      | -        | -      |
|                                                  | Prevalence                  | -                                        | -     | -      | -        | -      | -      | -        | -      |
|                                                  | Accuracy                    | -                                        | -     | -      | -        | -      | -      | -        | -      |
| AUC                                              | -                           | -                                        | -     | -      | -        | -      | -      | -        |        |
| Candela et al. <sup>(10)</sup><br>(2005)         | Sensitivity                 | -                                        | -     | 97%    | 96%      | 96%    | -      | 98%      | -      |
|                                                  | Specificity                 | -                                        | -     | 82%    | 94%      | 97%    | -      | 98%      | -      |
|                                                  | PPV                         | -                                        | -     | 93%    | 96%      | 98%    | -      | 98%      | -      |
|                                                  | NPV                         | -                                        | -     | 92%    | 94%      | 95%    | -      | 98%      | -      |
|                                                  | LR+                         | -                                        | -     | 5.39   | 16       | 32.0   | -      | 49.0     | -      |
|                                                  | LR-                         | -                                        | -     | 0.037  | 0.042    | 0.041  | -      | 0.020    | -      |
|                                                  | T+                          | -                                        | -     | 63     | 53       | 53     | -      | 45       | -      |
|                                                  | T-                          | -                                        | -     | 22     | 35       | 35     | -      | 45       | -      |
|                                                  | F+                          | -                                        | -     | 5      | 2        | 2      | -      | 1        | -      |
|                                                  | F-                          | -                                        | -     | 2      | 2        | 2      | -      | 1        | -      |
|                                                  | Prevalence                  | -                                        | -     | 71%    | 60%      | 60%    | -      | 50%      | -      |
|                                                  | Accuracy                    | -                                        | -     | 92.6%  | 95%      | 95%    | -      | 98%      | -      |
| AUC                                              | -                           | -                                        | 0.971 | 0.975  | 0.995    | -      | 0.996  | -        |        |
| Cheliout-Heraut et al. <sup>(11)</sup><br>(2011) | Sensitivity                 | -                                        | 83.6% | -      | -        | -      | -      | -        | -      |
|                                                  | Specificity                 | -                                        | 81.8% | -      | -        | -      | -      | -        | -      |
|                                                  | PPV                         | -                                        | -     | -      | -        | -      | -      | -        | -      |
|                                                  | NPV                         | -                                        | -     | -      | -        | -      | -      | -        | -      |
|                                                  | LR+                         | -                                        | 4.59  | -      | -        | -      | -      | -        | -      |
|                                                  | LR-                         | -                                        | 0.002 | -      | -        | -      | -      | -        | -      |
|                                                  | T+                          | -                                        | -     | -      | -        | -      | -      | -        | -      |
|                                                  | T-                          | -                                        | -     | -      | -        | -      | -      | -        | -      |
|                                                  | F+                          | -                                        | -     | -      | -        | -      | -      | -        | -      |
|                                                  | F-                          | -                                        | -     | -      | -        | -      | -      | -        | -      |
|                                                  | Prevalence                  | -                                        | -     | -      | -        | -      | -      | -        | -      |
|                                                  | Accuracy                    | -                                        | -     | -      | -        | -      | -      | -        | -      |
| AUC                                              | -                           | -                                        | -     | -      | -        | -      | -      | -        |        |
| Driver et al. <sup>(12)</sup><br>(2009)          | Sensitivity                 | -                                        | 97.0% | 84.0%  | 80.0%    | 80.0%  | -      | 70.0%    | -      |
|                                                  | Specificity                 | -                                        | 67.0% | 91.0%  | 97.0%    | 95.0%  | -      | 100.0%   | -      |
|                                                  | PPV                         | -                                        | 94.0% | 96.0%  | 97.0%    | 93.0%  | -      | 100.0%   | -      |
|                                                  | NPV                         | -                                        | 80.0% | 71.0%  | 76.0%    | 84.0%  | -      | 88.0%    | -      |
|                                                  | LR+                         | -                                        | 2.94  | 9.33   | 22.7     | 16.0   | -      | Infinity | -      |
|                                                  | LR-                         | -                                        | 0.04  | 0.18   | 0.21     | 0.21   | -      | 0.3      | -      |
|                                                  | T+                          | -                                        | 59    | 44     | 35       | 26     | -      | -        | -      |
|                                                  | T-                          | -                                        | -     | -      | -        | -      | -      | -        | -      |

Appendix to: El Shayeb M, Topfer LA, Stafinski T, et al. A comparison of level 3 portable sleep tests to level 1 polysomnography in the diagnosis of sleep-disordered breathing: a systematic review and meta-analysis. *CMAJ* 2013; DOI:10.1503/cmaj.130952. Copyright © 2013 Canadian Medical Association or its licensors

| Study                                     | Diagnostic Accuracy Measure | Sleep Study Apnea-Hypopnea Index Cut-off |       |        |          |        |        |          |        |
|-------------------------------------------|-----------------------------|------------------------------------------|-------|--------|----------|--------|--------|----------|--------|
|                                           |                             | ≤5/hr                                    | ≥5/hr | ≥10/hr | ≥15/hr   | ≥20/hr | ≥25/hr | ≥30/hr   | ≥50/hr |
|                                           | T-                          | -                                        | 8     | 19     | 28       | 38     | -      | -        | -      |
|                                           | F+                          | -                                        | 4     | 2      | 1        | 2      | -      | -        | -      |
|                                           | F-                          | -                                        | 2     | 8      | 9        | 7      | -      | -        | -      |
|                                           | Prevalence                  | -                                        | 84%   | 71%    | 60%      | 45%    | -      | -        | -      |
|                                           | Accuracy                    | -                                        | 92%   | 86%    | 86%      | 88%    | -      | -        | -      |
|                                           | AUC                         | -                                        | 0.94  | 0.944  | 0.926    | 0.889  | -      | 0.87     | -      |
| Ferre et al. <sup>(13)</sup><br>(2008)    | Sensitivity                 | -                                        | 93.3% | -      | 84.2%    | -      | -      | 55.6%    | -      |
|                                           | Specificity                 | -                                        | 86.7% | -      | 100%     | -      | -      | 96.4%    | -      |
|                                           | PPV                         | -                                        | -     | -      | -        | -      | -      | -        | -      |
|                                           | NPV                         | -                                        | -     | -      | -        | -      | -      | -        | -      |
|                                           | LR+                         | -                                        | 7.01  | -      | Infinity | -      | -      | 15.44    | -      |
|                                           | LR-                         | -                                        | 0.08  | -      | 0.16     | -      | -      | 0.46     | -      |
|                                           | T+                          | -                                        | -     | -      | -        | -      | -      | -        | -      |
|                                           | T-                          | -                                        | -     | -      | -        | -      | -      | -        | -      |
|                                           | F+                          | -                                        | -     | -      | -        | -      | -      | -        | -      |
|                                           | F-                          | -                                        | -     | -      | -        | -      | -      | -        | -      |
|                                           | Prevalence                  | -                                        | -     | -      | -        | -      | -      | -        | -      |
|                                           | Accuracy                    | -                                        | -     | -      | -        | -      | -      | -        | -      |
|                                           | AUC                         | -                                        | -     | -      | -        | -      | -      | -        | -      |
| Goodrich et al. <sup>(14)</sup><br>(2009) | Sensitivity                 | -                                        | 85%   | 92%    | 87%      | 85%    | 100%   | 88%      | -      |
|                                           | Specificity                 | -                                        | 67%   | 88%    | 82%      | 94%    | 97%    | 100%     | -      |
|                                           | PPV                         | -                                        | -     | -      | -        | -      | -      | -        | -      |
|                                           | NPV                         | -                                        | -     | -      | -        | -      | -      | -        | -      |
|                                           | LR+                         | -                                        | 2.58  | 7.67   | 4.83     | 14.16  | 33.33  | Infinity | -      |
|                                           | LR-                         | -                                        | 0.22  | 0.09   | 0.16     | 0.16   | -      | 0.12     | -      |
|                                           | T+                          | -                                        | -     | -      | -        | -      | -      | -        | -      |
|                                           | T-                          | -                                        | -     | -      | -        | -      | -      | -        | -      |
|                                           | F+                          | -                                        | -     | -      | -        | -      | -      | -        | -      |
|                                           | F-                          | -                                        | -     | -      | -        | -      | -      | -        | -      |
|                                           | Prevalence                  | -                                        | -     | -      | -        | -      | -      | -        | -      |
|                                           | Accuracy                    | -                                        | -     | -      | -        | -      | -      | -        | -      |
|                                           | AUC                         | -                                        | -     | -      | -        | -      | -      | -        | -      |
| Grant et al. <sup>(15)</sup><br>(2009)    | Sensitivity                 | -                                        | 97.0% | -      | 97.0%    | -      | -      | -        | -      |
|                                           | Specificity                 | -                                        | 73.0% | -      | 81.0%    | -      | -      | -        | -      |
|                                           | PPV                         | -                                        | -     | -      | 47.0%    | -      | -      | -        | -      |
|                                           | NPV                         | -                                        | -     | -      | 99.0%    | -      | -      | -        | -      |
|                                           | LR+                         | -                                        | 3.6   | -      | 5.1      | -      | -      | -        | -      |
|                                           | LR-                         | -                                        | 0.015 | -      | 0.041    | -      | -      | -        | -      |
|                                           | T+                          | -                                        | -     | -      | -        | -      | -      | -        | -      |
|                                           | T-                          | -                                        | -     | -      | -        | -      | -      | -        | -      |
|                                           | F+                          | -                                        | -     | -      | -        | -      | -      | -        | -      |
|                                           | F-                          | -                                        | -     | -      | -        | -      | -      | -        | -      |
|                                           | Prevalence                  | -                                        | -     | -      | -        | -      | -      | -        | -      |
|                                           | Accuracy                    | -                                        | -     | -      | -        | -      | -      | -        | -      |
|                                           | AUC                         | -                                        | -     | -      | -        | -      | -      | -        | -      |
| Ng et al. <sup>(16)</sup><br>(2010)       | Sensitivity                 | -                                        | 92.4% | 90.0%  | 87.8%    | 85.3%  | -      | -        | -      |
|                                           | Specificity                 | -                                        | 85.7% | 86.7%  | 94.9%    | 95.7%  | -      | -        | -      |
|                                           | PPV                         | -                                        | 96.8% | 91.8%  | 94.7%    | 93.5%  | -      | -        | -      |
|                                           | NPV                         | -                                        | 70.6% | 83.9%  | 88.1%    | 89.8%  | -      | -        | -      |
|                                           | LR                          | -                                        | 6.46  | 6.77   | 17.22    | 19.84  | -      | -        | -      |
|                                           | LR                          | -                                        | 0.089 | 0.115  | 0.126    | 0.154  | -      | -        | -      |
|                                           | T+                          | -                                        | 61    | 45     | 36       | 29     | -      | -        | -      |
|                                           | T-                          | -                                        | 12    | 26     | 37       | 44     | -      | -        | -      |
|                                           | F+                          | -                                        | 2     | 4      | 2        | 2      | -      | -        | -      |
|                                           | F-                          | -                                        | 5     | 5      | 5        | 5      | -      | -        | -      |
|                                           | Prevalence                  | -                                        | 82%   | 62%    | 51%      | 42%    | -      | -        | -      |
|                                           | Accuracy                    | -                                        | 91%   | 89%    | 91%      | 91%    | -      | -        | -      |

Appendix to: El Shayeb M, Topfer LA, Stafinski T, et al. A comparison of level 3 portable sleep tests to level 1 polysomnography in the diagnosis of sleep-disordered breathing: a systematic review and meta-analysis. *CMAJ* 2013; DOI:10.1503/cmaj.130952. Copyright © 2013 Canadian Medical Association or its licensors

| Study                                     | Diagnostic Accuracy Measure | Sleep Study Apnea-Hypopnea Index Cut-off |          |          |          |          |        |        |        |
|-------------------------------------------|-----------------------------|------------------------------------------|----------|----------|----------|----------|--------|--------|--------|
|                                           |                             | ≤5/hr                                    | ≥5/hr    | ≥10/hr   | ≥15/hr   | ≥20/hr   | ≥25/hr | ≥30/hr | ≥50/hr |
|                                           | AUC                         | -                                        | -        | -        | -        | -        | -      | -      | -      |
| NG et al. <sup>(17)</sup><br>(2009)       | Sensitivity                 | -                                        | 100%     | 97.7%    | 94.7%    | 96.9%    | -      | -      | -      |
|                                           | Specificity                 | -                                        | 100%     | 100%     | 100%     | 100%     | -      | -      | -      |
|                                           | PPV                         | -                                        | 100%     | 100%     | 100%     | 100%     | -      | -      | -      |
|                                           | NPV                         | -                                        | 100%     | 87.5%    | 85.7%    | 94.7%    | -      | -      | -      |
|                                           | LR                          | -                                        | infinity | infinity | Infinity | Infinity | -      | -      | -      |
|                                           | LR                          | -                                        | 0        | 0.23     | 0.05     | 0.031    | -      | -      | -      |
|                                           | T+                          | -                                        | -        | -        | -        | -        | -      | -      | -      |
|                                           | T-                          | -                                        | -        | -        | -        | -        | -      | -      | -      |
|                                           | F+                          | -                                        | -        | -        | -        | -        | -      | -      | -      |
|                                           | F-                          | -                                        | -        | -        | -        | -        | -      | -      | -      |
|                                           | Prevalence                  | -                                        | -        | -        | -        | -        | -      | -      | -      |
|                                           | Accuracy                    | -                                        | -        | -        | -        | -        | -      | -      | -      |
|                                           | AUC                         | -                                        | 1        | 1        | 0.99     | -        | -      | -      | -      |
| Nigro et al. <sup>(18)</sup><br>(2010)    | Sensitivity                 | -                                        | 75%      | -        | 85.7%    | -        | -      | 100%   | -      |
|                                           | Specificity                 | -                                        | 86.7%    | -        | 91.4%    | -        | -      | 98.8%  | -      |
|                                           | PPV                         | -                                        | 88.2%    | -        | 80%      | -        | -      | 77.3%  | -      |
|                                           | NPV                         | -                                        | 72.2%    | -        | 94.1%    | -        | -      | 100%   | -      |
|                                           | LR+                         | -                                        | 5.6      | -        | 10       | -        | -      | 9.8    | -      |
|                                           | LR-                         | -                                        | 0.29     | -        | 0.016    | -        | -      | -      | -      |
|                                           | T+                          | -                                        | 28       | -        | 16       | -        | -      | 17     | -      |
|                                           | T-                          | -                                        | 25       | -        | 43       | -        | -      | 44     | -      |
|                                           | F+                          | -                                        | 4        | -        | 4        | -        | -      | 5      | -      |
|                                           | F-                          | -                                        | 9        | -        | 3        | -        | -      | 0      | -      |
|                                           | Prevalence                  | -                                        | 57%      | -        | 29%      | -        | -      | 26%    | -      |
|                                           | Accuracy                    | -                                        | 80%      | -        | 90%      | -        | -      | 92%    | -      |
|                                           | AUC                         | -                                        | -        | -        | -        | -        | -      | -      | -      |
| Orr et al. <sup>(19)</sup><br>(2006)      | Sensitivity                 | -                                        | -        | 83.0%    | 82.0%    | -        | 100%   | -      | -      |
|                                           | Specificity                 | -                                        | 81.0%    | 87.0%    | 81%      | -        | -      | 100%   | -      |
|                                           | PPV                         | -                                        | -        | -        | -        | -        | -      | -      | -      |
|                                           | NPV                         | -                                        | -        | -        | -        | -        | -      | -      | -      |
|                                           | LR+                         | -                                        | -        | 6.38     | 4.31     | -        | -      | -      | -      |
|                                           | LR-                         | -                                        | -        | 0.195    | 0.222    | -        | -      | -      | -      |
|                                           | T+                          | -                                        | -        | -        | -        | -        | -      | -      | -      |
|                                           | T-                          | -                                        | -        | -        | -        | -        | -      | -      | -      |
|                                           | F+                          | -                                        | -        | -        | -        | -        | -      | -      | -      |
|                                           | F-                          | -                                        | -        | -        | -        | -        | -      | -      | -      |
|                                           | Prevalence                  | -                                        | -        | -        | -        | -        | -      | -      | -      |
|                                           | Accuracy                    | -                                        | -        | -        | -        | -        | -      | -      | -      |
|                                           | AUC                         | -                                        | -        | -        | -        | -        | -      | -      | -      |
| Su S, et al. <sup>(20)</sup><br>(2004)    | Sensitivity                 | -                                        | 98.0%    | 87.8%    | 83.9%    | -        | -      | -      | -      |
|                                           | Specificity                 | -                                        | 40.0%    | 73.7%    | 75.9%    | -        | -      | -      | -      |
|                                           | PPV                         | -                                        | 89.1%    | 87.8%    | 78.8%    | -        | -      | -      | -      |
|                                           | NPV                         | -                                        | 80.0%    | 73.7%    | 81.5%    | -        | -      | -      | -      |
|                                           | LR+                         | -                                        | 1.63     | 3.33     | 3.64     | -        | -      | -      | -      |
|                                           | LR-                         | -                                        | 0.05     | 0.165    | 0.159    | -        | -      | -      | -      |
|                                           | T+                          | -                                        | 49       | 36       | 26       | -        | -      | -      | -      |
|                                           | T-                          | -                                        | 4        | 14       | 23       | -        | -      | -      | -      |
|                                           | F+                          | -                                        | 6        | 5        | 7        | -        | -      | -      | -      |
|                                           | F-                          | -                                        | 1        | 5        | 4        | -        | -      | -      | -      |
|                                           | Prevalence                  | -                                        | 88.8%    | 68%      | 50%      | -        | -      | -      | -      |
|                                           | Accuracy                    | -                                        | 88.3%    | 83%      | 82%      | -        | -      | -      | -      |
|                                           | AUC                         | -                                        | 0.945    | 0.908    | 0.872    | -        | -      | -      | -      |
| Sullivan et al. <sup>(21)</sup><br>(2009) | Sensitivity                 | 70.0%                                    | 86.0%    | -        | 57.0%    | -        | -      | 75.0%  | -      |
|                                           | Specificity                 | 100%                                     | 82.0%    | -        | 88.0%    | -        | -      | 97.0%  | -      |
|                                           | PPV                         | -                                        | -        | -        | -        | -        | -      | -      | -      |

Appendix to: El Shayeb M, Topfer LA, Stafinski T, et al. A comparison of level 3 portable sleep tests to level 1 polysomnography in the diagnosis of sleep-disordered breathing: a systematic review and meta-analysis. *CMAJ* 2013; DOI:10.1503/cmaj.130952. Copyright © 2013 Canadian Medical Association or its licensors

| Study                                 | Diagnostic Accuracy Measure | Sleep Study Apnea-Hypopnea Index Cut-off |          |        |        |        |        |        |        |
|---------------------------------------|-----------------------------|------------------------------------------|----------|--------|--------|--------|--------|--------|--------|
|                                       |                             | ≤5/hr                                    | ≥5/hr    | ≥10/hr | ≥15/hr | ≥20/hr | ≥25/hr | ≥30/hr | ≥50/hr |
|                                       | NPV                         | -                                        | -        | -      | -      | -      | -      | -      | -      |
|                                       | LR+                         | infinity                                 | 4.78     | -      | 4.75   | -      | -      | 25.0   | -      |
|                                       | LR-                         | 0.3                                      | 0.17     | -      | 0.49   | -      | -      | 0.26   | -      |
|                                       | T+                          | -                                        | -        | -      | -      | -      | -      | -      | -      |
|                                       | T-                          | -                                        | -        | -      | -      | -      | -      | -      | -      |
|                                       | F+                          | -                                        | -        | -      | -      | -      | -      | -      | -      |
|                                       | F-                          | -                                        | -        | -      | -      | -      | -      | -      | -      |
|                                       | Prevalence                  | -                                        | -        | -      | -      | -      | -      | -      | -      |
|                                       | Accuracy                    | -                                        | -        | -      | -      | -      | -      | -      | -      |
|                                       | AUC                         | -                                        | -        | -      | -      | -      | -      | -      | -      |
| Takaman et al. <sup>(22)</sup> (2010) | Sensitivity                 | -                                        | -        | -      | -      | 81%    | -      | -      | -      |
|                                       | Specificity                 | -                                        | -        | -      | -      | 86%    | -      | -      | -      |
|                                       | PPV                         | -                                        | -        | -      | -      | -      | -      | -      | -      |
|                                       | NPV                         | -                                        | -        | -      | -      | -      | -      | -      | -      |
|                                       | LR+                         | -                                        | -        | -      | -      | 5.79   | -      | -      | -      |
|                                       | LR_                         | -                                        | -        | -      | -      | 0.25   | -      | -      | -      |
|                                       | T+                          | -                                        | -        | -      | -      | -      | -      | -      | -      |
|                                       | T-                          | -                                        | -        | -      | -      | -      | -      | -      | -      |
|                                       | F+                          | -                                        | -        | -      | -      | -      | -      | -      | -      |
|                                       | F-                          | -                                        | -        | -      | -      | -      | -      | -      | -      |
|                                       | Prevalence                  | -                                        | -        | -      | -      | -      | -      | -      | -      |
|                                       | Accuracy                    | -                                        | -        | -      | -      | -      | -      | -      | -      |
|                                       | AUC                         | -                                        | -        | -      | -      | 0.87   | -      | -      | -      |
| To et al. <sup>(23)</sup> (2009)      | Sensitivity                 | -                                        | 84.0%    | -      | -      | -      | -      | -      | -      |
|                                       | Specificity                 | -                                        | 100%     | -      | -      | -      | -      | -      | -      |
|                                       | PPV                         | -                                        | 100%     | -      | -      | -      | -      | -      | -      |
|                                       | NPV                         | -                                        | 27%      | -      | -      | -      | -      | -      | -      |
|                                       | LR+                         | -                                        | Infinity | -      | -      | -      | -      | -      | -      |
|                                       | LR-                         | -                                        | 0.16     | -      | -      | -      | -      | -      | -      |
|                                       | ROC                         | -                                        | -        | -      | -      | -      | -      | -      | -      |
|                                       | T+                          | -                                        | -        | -      | -      | -      | -      | -      | -      |
|                                       | T-                          | -                                        | -        | -      | -      | -      | -      | -      | -      |
|                                       | F+                          | -                                        | -        | -      | -      | -      | -      | -      | -      |
|                                       | F-                          | -                                        | -        | -      | -      | -      | -      | -      | -      |
|                                       | Prevalence                  | -                                        | -        | -      | -      | -      | -      | -      | -      |
|                                       | Accuracy                    | -                                        | -        | -      | -      | -      | -      | -      | -      |
|                                       | AUC                         | -                                        | 0.96     | -      | -      | -      | -      | -      | -      |
| Yagi et al. <sup>(24)</sup> (2008)    | Sensitivity                 | -                                        | -        | -      | 95%    | -      | -      | -      | -      |
|                                       | Specificity                 | -                                        | -        | -      | -      | -      | -      | -      | -      |
|                                       | PPV                         | -                                        | -        | -      | 95%    | -      | -      | -      | -      |
|                                       | NPV                         | -                                        | -        | -      | -      | -      | -      | -      | -      |
|                                       | LR+                         | -                                        | -        | -      | -      | -      | -      | -      | -      |
|                                       | LR-                         | -                                        | -        | -      | -      | -      | -      | -      | -      |
|                                       | ROC                         | -                                        | -        | -      | -      | -      | -      | -      | -      |
|                                       | T+                          | -                                        | -        | -      | -      | -      | -      | -      | -      |
|                                       | T-                          | -                                        | -        | -      | -      | -      | -      | -      | -      |
|                                       | F+                          | -                                        | -        | -      | -      | -      | -      | -      | -      |
|                                       | F-                          | -                                        | -        | -      | -      | -      | -      | -      | -      |
|                                       | Prevalence                  | -                                        | -        | -      | -      | -      | -      | -      | -      |
|                                       | Accuracy                    | -                                        | -        | -      | -      | -      | -      | -      | -      |
|                                       | AUC                         | -                                        | -        | -      | -      | -      | -      | -      | -      |
| <b>Separate studies</b>               |                             |                                          |          |        |        |        |        |        |        |
| Alvarez et al. <sup>(25)</sup> (2008) | Sensitivity                 | -                                        | -        | 61.9%  | -      | -      | -      | -      | -      |
|                                       | Specificity                 | -                                        | -        | 95.8%  | -      | -      | -      | -      | -      |
|                                       | PPV                         | -                                        | -        | 92.9%  | -      | -      | -      | -      | -      |

| Study                                         | Diagnostic Accuracy Measure | Sleep Study Apnea-Hypopnea Index Cut-off |       |        |        |        |        |        |        |
|-----------------------------------------------|-----------------------------|------------------------------------------|-------|--------|--------|--------|--------|--------|--------|
|                                               |                             | ≤5/hr                                    | ≥5/hr | ≥10/hr | ≥15/hr | ≥20/hr | ≥25/hr | ≥30/hr | ≥50/hr |
|                                               | NPV                         | -                                        | -     | 74.2%  | -      | -      | -      | -      | -      |
|                                               | LR+                         | -                                        | -     | 14.78  | -      | -      | -      | -      | -      |
|                                               | LR-                         | -                                        | -     | 0.40   | -      | -      | -      | -      | -      |
|                                               | T+                          | -                                        | -     | 13     | -      | -      | -      | -      | -      |
|                                               | T-                          | -                                        | -     | 23     | -      | -      | -      | -      | -      |
|                                               | F+                          | -                                        | -     | 1      | -      | -      | -      | -      | -      |
|                                               | F-                          | -                                        | -     | 8      | -      | -      | -      | -      | -      |
|                                               | Prevalence                  | -                                        | -     | 47%    | -      | -      | -      | -      | -      |
|                                               | Accuracy                    | -                                        | -     | 80%    | -      | -      | -      | -      | -      |
|                                               | AUC                         | -                                        | -     | 0.875  | -      | -      | -      | -      | -      |
| Campbell et al. <sup>(26)</sup><br>(2010)     | Sensitivity                 | -                                        | 88%   | 90.5%  | 93.7%  | -      | -      | -      | -      |
|                                               | Specificity                 | -                                        | 50%   | 88.9%  | 96.9%  | -      | -      | -      | -      |
|                                               | PPV                         | -                                        | -     | -      | -      | -      | -      | -      | -      |
|                                               | NPV                         | -                                        | -     | -      | -      | -      | -      | -      | -      |
|                                               | LR+                         | -                                        | 1.76  | 8.14   | 4.06   | -      | -      | -      | -      |
|                                               | LR-                         | -                                        | 0.24  | 0.11   | 0.81   | -      | -      | -      | -      |
|                                               | T+                          | -                                        | -     | -      | -      | -      | -      | -      | -      |
|                                               | T-                          | -                                        | -     | -      | -      | -      | -      | -      | -      |
|                                               | F+                          | -                                        | -     | -      | -      | -      | -      | -      | -      |
|                                               | F-                          | -                                        | -     | -      | -      | -      | -      | -      | -      |
|                                               | Prevalence                  | -                                        | -     | -      | -      | -      | -      | -      | -      |
|                                               | Accuracy                    | -                                        | -     | -      | -      | -      | -      | -      | -      |
|                                               | AUC                         | -                                        | 0.90  | 0.92   | 0.94   | -      | -      | -      | -      |
| Cilli et al. <sup>(27)</sup><br>(2006)        | Sensitivity                 | -                                        | 93.0% | -      | -      | -      | -      | -      | -      |
|                                               | Specificity                 | -                                        | 44.4% | -      | -      | -      | -      | -      | -      |
|                                               | PPV                         | -                                        | 89.5% | -      | -      | -      | -      | -      | -      |
|                                               | NPV                         | -                                        | 57.1% | -      | -      | -      | -      | -      | -      |
|                                               | LR+                         | -                                        | 1.67  | -      | -      | -      | -      | -      | -      |
|                                               | LR-                         | -                                        | 0.16  | -      | -      | -      | -      | -      | -      |
|                                               | T+                          | -                                        | 43    | -      | -      | -      | -      | -      | -      |
|                                               | T-                          | -                                        | 4     | -      | -      | -      | -      | -      | -      |
|                                               | F+                          | -                                        | 5     | -      | -      | -      | -      | -      | -      |
|                                               | F-                          | -                                        | 3     | -      | -      | -      | -      | -      | -      |
|                                               | Prevalence                  | -                                        | -     | -      | -      | -      | -      | -      | -      |
|                                               | Accuracy                    | -                                        | -     | -      | -      | -      | -      | -      | -      |
|                                               | AUC                         | -                                        | -     | -      | -      | -      | -      | -      | -      |
| Danzi-Soares et al. <sup>(28)</sup><br>(2012) | Sensitivity                 | -                                        | 92%   | -      | 67%    | -      | -      | -      | -      |
|                                               | Specificity                 | -                                        | 66%   | -      | 78%    | -      | -      | -      | -      |
|                                               | PPV                         | -                                        | 95%   | -      | 78%    | -      | -      | -      | -      |
|                                               | NPV                         | -                                        | 54%   | -      | 66%    | -      | -      | -      | -      |
|                                               | + LR                        | -                                        | 2.75  | -      | 3.61   | -      | -      | -      | -      |
|                                               | - LR                        | -                                        | 0.12  | -      | 0.44   | -      | -      | -      | -      |
|                                               | T+                          | -                                        | 56    | -      | 26     | -      | -      | -      | -      |
|                                               | T-                          | -                                        | 6     | -      | 25     | -      | -      | -      | -      |
|                                               | F+                          | -                                        | 3     | -      | 7      | -      | -      | -      | -      |
|                                               | F-                          | -                                        | 5     | -      | 13     | -      | -      | -      | -      |
|                                               | Prevalence                  | -                                        | 87.5% | -      | 55%    | -      | -      | -      | -      |
|                                               | Accuracy                    | -                                        | 88.5% | -      | 72.8%  | -      | -      | -      | -      |
|                                               | AUC                         | -                                        | 0.90  | -      | 0.79   | -      | -      | -      | -      |
| Finkel et al. <sup>(29)</sup><br>(2009)       | Sensitivity                 | -                                        | 95.0% | -      | -      | -      | -      | -      | -      |
|                                               | Specificity                 | -                                        | 33.3% | -      | -      | -      | -      | -      | -      |
|                                               | PPV                         | -                                        | 83.0% | -      | -      | -      | -      | -      | -      |
|                                               | NPV                         | -                                        | 67.0% | -      | -      | -      | -      | -      | -      |
|                                               | LR+                         | -                                        | 1.42  | -      | -      | -      | -      | -      | -      |
|                                               | LR-                         | -                                        | 0.15  | -      | -      | -      | -      | -      | -      |
|                                               | T+                          | -                                        | -     | -      | -      | -      | -      | -      | -      |
|                                               | T-                          | -                                        | -     | -      | -      | -      | -      | -      | -      |

Appendix to: El Shayeb M, Topfer LA, Stafinski T, et al. A comparison of level 3 portable sleep tests to level 1 polysomnography in the diagnosis of sleep-disordered breathing: a systematic review and meta-analysis. *CMAJ* 2013; DOI:10.1503/cmaj.130952. Copyright © 2013 Canadian Medical Association or its licensors



| Study                                      | Diagnostic Accuracy Measure | Sleep Study Apnea-Hypopnea Index Cut-off |          |        |        |          |        |          |        |
|--------------------------------------------|-----------------------------|------------------------------------------|----------|--------|--------|----------|--------|----------|--------|
|                                            |                             | ≤5/hr                                    | ≥5/hr    | ≥10/hr | ≥15/hr | ≥20/hr   | ≥25/hr | ≥30/hr   | ≥50/hr |
|                                            | F+                          | -                                        | -        | -      | -      | -        | -      | -        | -      |
|                                            | F-                          | -                                        | -        | -      | -      | -        | -      | -        | -      |
|                                            | Prevalence                  | -                                        | -        | -      | -      | -        | -      | -        | -      |
|                                            | Accuracy                    | -                                        | -        | -      | -      | -        | -      | -        | -      |
|                                            | AUC                         | -                                        | -        | -      | -      | -        | -      | -        | -      |
| Fordyce et al. <sup>(30)</sup><br>(2009)   | Sensitivity                 | -                                        | 80.0%    | -      | -      | -        | -      | -        | -      |
|                                            | Specificity                 | -                                        | 100%     | -      | -      | -        | -      | -        | -      |
|                                            | PPV                         | -                                        | 100%     | -      | -      | -        | -      | -        | -      |
|                                            | NPV                         | -                                        | 80.0%    | -      | -      | -        | -      | -        | -      |
|                                            | LR+                         | -                                        | Infinity | -      | -      | -        | -      | -        | -      |
|                                            | LR-                         | -                                        | 0.20     | -      | -      | -        | -      | -        | -      |
|                                            | T+                          | -                                        | -        | -      | -      | -        | -      | -        | -      |
|                                            | T-                          | -                                        | -        | -      | -      | -        | -      | -        | -      |
|                                            | F+                          | -                                        | -        | -      | -      | -        | -      | -        | -      |
|                                            | F-                          | -                                        | -        | -      | -      | -        | -      | -        | -      |
|                                            | Prevalence                  | -                                        | -        | -      | -      | -        | -      | -        | -      |
|                                            | Accuracy                    | -                                        | -        | -      | -      | -        | -      | -        | -      |
|                                            | AUC                         | -                                        | -        | -      | -      | -        | -      | -        | -      |
| Furukawa et al. <sup>(31)</sup><br>(2009)  | Sensitivity                 | -                                        | -        | -      | -      | 88%      | 77%    | 72%      | -      |
|                                            | Specificity                 | -                                        | -        | -      | -      | 61%      | 81%    | 90%      | -      |
|                                            | PPV                         | -                                        | -        | -      | -      | 76%      | 84.6%  | 91.2%    | -      |
|                                            | NPV                         | -                                        | -        | -      | -      | 79.1%    | 71.4%  | 70%      | -      |
|                                            | LR+                         | -                                        | -        | -      | -      | 2.25     | 4.05   | 7.2      | -      |
|                                            | LR-                         | -                                        | -        | -      | -      | 0.19     | 0.28   | 0.31     | -      |
|                                            | ROC                         | -                                        | -        | -      | -      | 38       | 33     | 31       | -      |
|                                            | T+                          | -                                        | -        | -      | -      | 19       | 25     | 28       | -      |
|                                            | T-                          | -                                        | -        | -      | -      | 12       | 6      | 3        | -      |
|                                            | F+                          | -                                        | -        | -      | -      | 5        | 10     | 12       | -      |
|                                            | F-                          | -                                        | -        | -      | -      | -        | -      | -        | -      |
|                                            | Prevalence                  | -                                        | -        | -      | -      | 75.7%    | 78.4%  | 79%      | -      |
|                                            | Accuracy                    | -                                        | -        | -      | -      | -        | -      | -        | -      |
| AUC                                        | -                           | -                                        | -        | -      | -      | -        | -      | -        |        |
| Gjevre et al. <sup>(32)</sup><br>(2011)    | Sensitivity                 | -                                        | 90%      | 75%    | 62.5%  | 46%      | -      | 28.1%    | -      |
|                                            | Specificity                 | -                                        | 66%      | 86.7%  | 93.3%  | 100%     | -      | 100%     | -      |
|                                            | PPV                         | -                                        | 83%      | 92.3%  | 95.2%  | 100%     | -      | 100%     | -      |
|                                            | NPV                         | -                                        | 75%      | 61.9%  | 53.9%  | 46.9%    | -      | 39.5%    | -      |
|                                            | LR+                         | -                                        | 2.26     | 5.63   | 9.32   | Infinity | -      | Infinity | -      |
|                                            | LR-                         | -                                        | 0.156    | 0.288  | 0.402  | -        | -      | -        | -      |
|                                            | T+                          | -                                        | 29       | 24     | 20     | -        | -      | -        | -      |
|                                            | T-                          | -                                        | 9        | 13     | 14     | -        | -      | -        | -      |
|                                            | F+                          | -                                        | 6        | 2      | 1      | -        | -      | -        | -      |
|                                            | F-                          | -                                        | 3        | 8      | 12     | -        | -      | -        | -      |
|                                            | Prevalence                  | -                                        | 68%      | 68%    | 68%    | -        | -      | -        | -      |
|                                            | Accuracy                    | -                                        | 80%      | 78.7%  | 72.3%  | -        | -      | -        | -      |
|                                            | AUC                         | -                                        | -        | -      | -      | -        | -      | 0.88     | -      |
| Hernandez et al. <sup>(33)</sup><br>(2007) | Sensitivity                 | -                                        | -        | 83.3%  | -      | -        | -      | -        | -      |
|                                            | Specificity                 | -                                        | -        | 78.9%  | -      | -        | -      | -        | -      |
|                                            | PPV                         | -                                        | -        | 91.8%  | -      | -        | -      | -        | -      |
|                                            | NPV                         | -                                        | -        | 62.5%  | -      | -        | -      | -        | -      |
|                                            | LR+                         | -                                        | -        | 3.95   | -      | -        | -      | -        | -      |
|                                            | LR-                         | -                                        | -        | 0.21   | -      | -        | -      | -        | -      |
|                                            | T+                          | -                                        | -        | 45     | -      | -        | -      | -        | -      |
|                                            | T-                          | -                                        | -        | 15     | -      | -        | -      | -        | -      |
|                                            | F+                          | -                                        | -        | 4      | -      | -        | -      | -        | -      |
|                                            | F-                          | -                                        | -        | 9      | -      | -        | -      | -        | -      |
|                                            | Prevalence                  | -                                        | -        | -      | -      | -        | -      | -        | -      |

| Study                                             | Diagnostic Accuracy Measure | Sleep Study Apnea-Hypopnea Index Cut-off |       |        |        |        |        |        |        |
|---------------------------------------------------|-----------------------------|------------------------------------------|-------|--------|--------|--------|--------|--------|--------|
|                                                   |                             | ≤5/hr                                    | ≥5/hr | ≥10/hr | ≥15/hr | ≥20/hr | ≥25/hr | ≥30/hr | ≥50/hr |
|                                                   | Accuracy                    | -                                        | -     | -      | -      | -      | -      | -      | -      |
|                                                   | AUC                         | -                                        | -     | -      | -      | -      | -      | -      | -      |
| Masa et al. <sup>(34)</sup><br>(2011)             | Sensitivity                 | -                                        | -     | -      | -      | -      | -      | 52%    | -      |
|                                                   | Specificity                 | -                                        | -     | -      | -      | -      | -      | 76%    | -      |
|                                                   | PPV                         | -                                        | -     | -      | -      | -      | -      | -      | -      |
|                                                   | NPV                         | -                                        | -     | -      | -      | -      | -      | -      | -      |
|                                                   | LR+                         | -                                        | -     | -      | -      | -      | -      | 2.18   | -      |
|                                                   | LR-                         | -                                        | -     | -      | -      | -      | -      | 0.63   | -      |
|                                                   | T+                          | -                                        | -     | -      | -      | -      | -      | -      | -      |
|                                                   | T-                          | -                                        | -     | -      | -      | -      | -      | -      | -      |
|                                                   | F+                          | -                                        | -     | -      | -      | -      | -      | -      | -      |
|                                                   | F-                          | -                                        | -     | -      | -      | -      | -      | -      | -      |
|                                                   | Prevalence                  | -                                        | -     | -      | -      | -      | -      | -      | -      |
|                                                   | Accuracy                    | -                                        | -     | -      | -      | -      | -      | -      | -      |
|                                                   | AUC                         | -                                        | -     | -      | -      | -      | -      | -      |        |
| Masdeu et al. <sup>(35)</sup><br>(2010)           | Sensitivity                 | -                                        | -     | 86%    | 81%    | -      | -      | -      | -      |
|                                                   | Specificity                 | -                                        | -     | 84%    | 94%    | -      | -      | -      | -      |
|                                                   | PPV                         | -                                        | -     | -      | -      | -      | -      | -      | -      |
|                                                   | NPV                         | -                                        | -     | -      | -      | -      | -      | -      | -      |
|                                                   | LR+                         | -                                        | -     | 5.375  | 13.5   | -      | -      | -      | -      |
|                                                   | LR-                         | -                                        | -     | 0.166  | 0.202  | -      | -      | -      | -      |
|                                                   | T+                          | -                                        | -     | -      | -      | -      | -      | -      | -      |
|                                                   | T-                          | -                                        | -     | -      | -      | -      | -      | -      | -      |
|                                                   | F+                          | -                                        | -     | -      | -      | -      | -      | -      | -      |
|                                                   | F-                          | -                                        | -     | -      | -      | -      | -      | -      | -      |
|                                                   | Prevalence                  | -                                        | -     | -      | -      | -      | -      | -      | -      |
|                                                   | Accuracy                    | -                                        | -     | 85%    | 86%    | -      | -      | -      | -      |
|                                                   | AUC                         | -                                        | -     | -      | -      | -      | -      | -      |        |
| Quintana-Gallego et al. <sup>(36)</sup><br>(2004) | Sensitivity                 | -                                        | 82.5% | 79.3%  | 68.4%  | -      | -      | -      | -      |
|                                                   | Specificity                 | -                                        | 88.6% | 97.8%  | 94.6%  | -      | -      | -      | -      |
|                                                   | PPV                         | -                                        | -     | -      | -      | -      | -      | -      | -      |
|                                                   | NPV                         | -                                        | -     | -      | -      | -      | -      | -      | -      |
|                                                   | LR+                         | -                                        | 7.24  | 36.04  | 12.67  | -      | -      | -      | -      |
|                                                   | LR-                         | -                                        | 0.20  | 0.21   | 0.33   | -      | -      | -      | -      |
|                                                   | T+                          | -                                        | -     | -      | -      | -      | -      | -      | -      |
|                                                   | T-                          | -                                        | -     | -      | -      | -      | -      | -      | -      |
|                                                   | F+                          | -                                        | -     | -      | -      | -      | -      | -      | -      |
|                                                   | F-                          | -                                        | -     | -      | -      | -      | -      | -      | -      |
|                                                   | Prevalence                  | -                                        | -     | -      | -      | -      | -      | -      | -      |
|                                                   | Accuracy                    | -                                        | -     | -      | -      | -      | -      | -      | -      |
|                                                   | AUC                         | -                                        | 0.986 | 0.907  | 0.862  | -      | -      | -      |        |
| Shrivastava et al. <sup>(37)</sup><br>(2006)      | Sensitivity                 | -                                        | -     | -      | 86.4%  | -      | -      | -      | -      |
|                                                   | Specificity                 | -                                        | -     | -      | 80.8%  | -      | -      | -      | -      |
|                                                   | PPV                         | -                                        | -     | -      | -      | -      | -      | -      | -      |
|                                                   | NPV                         | -                                        | -     | -      | -      | -      | -      | -      | -      |
|                                                   | LR+                         | -                                        | -     | -      | 4.50   | -      | -      | -      | -      |
|                                                   | LR-                         | -                                        | -     | -      | 0.17   | -      | -      | -      | -      |
|                                                   | T+                          | -                                        | -     | -      | -      | -      | -      | -      | -      |
|                                                   | T-                          | -                                        | -     | -      | -      | -      | -      | -      | -      |
|                                                   | F+                          | -                                        | -     | -      | -      | -      | -      | -      | -      |
|                                                   | F-                          | -                                        | -     | -      | -      | -      | -      | -      | -      |
|                                                   | Prevalence                  | -                                        | -     | -      | -      | -      | -      | -      | -      |
|                                                   | Accuracy                    | -                                        | -     | -      | -      | -      | -      | -      | -      |
|                                                   | AUC                         | -                                        | -     | -      | -      | -      | -      | -      |        |
| Skomro et al. <sup>(38)</sup><br>(2005)           | Sensitivity                 | -                                        | 92.0% | -      | -      | -      | -      | -      | -      |
|                                                   | Specificity                 | -                                        | 67.0% | -      | -      | -      | -      | -      | -      |
|                                                   | PPV                         | -                                        | 88.0% | -      | -      | -      | -      | -      | -      |

| Study                                | Diagnostic Accuracy Measure | Sleep Study Apnea-Hypopnea Index Cut-off |       |        |        |        |        |        |        |
|--------------------------------------|-----------------------------|------------------------------------------|-------|--------|--------|--------|--------|--------|--------|
|                                      |                             | ≤5/hr                                    | ≥5/hr | ≥10/hr | ≥15/hr | ≥20/hr | ≥25/hr | ≥30/hr | ≥50/hr |
|                                      | NPV                         | -                                        | 75.0% | -      | -      | -      | -      | -      | -      |
|                                      | LR+                         | -                                        | 2.79  | -      | -      | -      | -      | -      | -      |
|                                      | LR-                         | -                                        | 0.12  | -      | -      | -      | -      | -      | -      |
|                                      | T+                          | -                                        | 22    | -      | -      | -      | -      | -      | -      |
|                                      | T-                          | -                                        | 6     | -      | -      | -      | -      | -      | -      |
|                                      | F+                          | -                                        | 3     | -      | -      | -      | -      | -      | -      |
|                                      | F-                          | -                                        | 2     | -      | -      | -      | -      | -      | -      |
|                                      | Prevalence                  | -                                        | -     | -      | -      | -      | -      | -      | -      |
|                                      | Accuracy                    | -                                        | -     | -      | -      | -      | -      | -      | -      |
|                                      | AUC                         | -                                        | -     | -      | -      | -      | -      | -      | -      |
| To et al. <sup>(39)</sup><br>(2012)  | Sensitivity                 | -                                        | -     | 89%    | -      | -      | -      | -      | -      |
|                                      | Specificity                 | -                                        | -     | 50%    | -      | -      | -      | -      | -      |
|                                      | PPV                         | -                                        | -     | -      | -      | -      | -      | -      | -      |
|                                      | NPV                         | -                                        | -     | -      | -      | -      | -      | -      | -      |
|                                      | LR+                         | -                                        | -     | 1.78   | -      | -      | -      | -      | -      |
|                                      | LR-                         | -                                        | -     | 0.22   | -      | -      | -      | -      | -      |
|                                      | T+                          | -                                        | -     | -      | -      | -      | -      | -      | -      |
|                                      | T-                          | -                                        | -     | -      | -      | -      | -      | -      | -      |
|                                      | F+                          | -                                        | -     | -      | -      | -      | -      | -      | -      |
|                                      | F-                          | -                                        | -     | -      | -      | -      | -      | -      | -      |
|                                      | Prevalence                  | -                                        | -     | -      | -      | -      | -      | -      | -      |
|                                      | Accuracy                    | -                                        | -     | -      | -      | -      | -      | -      | -      |
|                                      | AUC                         | -                                        | -     | 0.89   | -      | -      | -      | -      | -      |
| Yin et al. <sup>(40)</sup><br>(2006) | Sensitivity                 | -                                        | 100%  | -      | 93.8%  | -      | -      | 79.2%  | 90.0%  |
|                                      | Specificity                 | -                                        | -     | -      | 25.0%  | -      | -      | 70.0%  | 97.1%  |
|                                      | PPV                         | -                                        | 93.2% | -      | 76.9%  | -      | -      | 76.0%  | 90.0%  |
|                                      | NPV                         | -                                        | -     | -      | 60.0%  | -      | -      | 73.7%  | 97.1%  |
|                                      | LR+                         | -                                        | -     | -      | 1.25   | -      | -      | 2.64   | 31.03  |
|                                      | LR-                         | -                                        | -     | -      | 0.228  | -      | -      | 0.297  | 0.103  |
|                                      | T+                          | -                                        | -     | -      | 30     | -      | -      | 19     | 9      |
|                                      | T-                          | -                                        | -     | -      | 3      | -      | -      | 14     | 33     |
|                                      | F+                          | -                                        | -     | -      | 9      | -      | -      | 6      | 1      |
|                                      | F-                          | -                                        | -     | -      | 2      | -      | -      | 5      | 1      |
|                                      | Prevalence                  | -                                        | -     | -      | 72%    | -      | -      | 54%    | 23%    |
|                                      | Accuracy                    | -                                        | -     | -      | -      | -      | -      | -      | -      |
|                                      | AUC                         | -                                        | -     | -      | -      | -      | -      | -      | -      |

AUC = area under the curve; F+ = false positive; F- = false negative; LR+ = positive likelihood ratio; LR- = negative likelihood ratio; NPV = negative predictive value; PPV = positive predictive value; T+ = true positive; T- = true negative;

## References

- (1) Abraham WT, Trupp RJ, Phillips B, Bourge RC, Bailey B, Harding SM, et al. Validation and clinical utility of a simple in-home testing tool for sleep-disordered breathing and arrhythmias in heart failure: results of the Sleep Events, Arrhythmias, and Respiratory Analysis in Congestive Heart Failure (SEARCH) study. *Congest Heart Fail* 2006;12(5):241-7.
- (2) Ayappa I, Norman RG, Seelall V, Rapoport DM. Validation of a self-applied unattended monitor for sleep disordered breathing. *J Clin Sleep Med* 2008;4(1):26-37.

- (3) Garcia-Diaz E, Quintana-Gallego E, Ruiz A, Carmona-Bernal C, Sanchez-Armengol A, Botbol-Benhamou G, et al. Respiratory polygraphy with actigraphy in the diagnosis of sleep apnea-hypopnea syndrome. *Chest* 2007;131(3):725-32.
- (4) Kuna ST, Seeger T, Brendel M. Intra-subject comparison of polysomnography and a type 3 portable monitor [abstract]. *Sleep* 2005;28(Suppl):A324 (Abstract no. 0956).
- (5) Polese JF, Santos SR, Sartori DE, Carlos VA, Kobayashi RF, Ferrari PMP, et al. Validation of a portable monitoring system for the diagnosis of obstructive sleep apnea in elderly patients [abstract]. *Sleep Medicine* 2009;10(Suppl 2):S22 (Abstract no. 078).
- (6) Santos-Silva R, Sartori DE, Truksinas V, Truksinas E, Alonso FF, Tufik S, et al. Validation of a portable monitoring system for the diagnosis of obstructive sleep apnea syndrome. *Sleep* 2009;32(5):629-36.
- (7) Smith LA, Chong DW, Vennelle M, Denvir MA, Newby DE, Douglas NJ. Diagnosis of sleep-disordered breathing in patients with chronic heart failure: evaluation of a portable limited sleep study system. *J Sleep Res* 2007;16(4):428-35.
- (8) Tonelli de Oliveira AC, Martinez D, Vasconcelos LF, Goncalves SC, Lenz MC, Fuchs SC, et al. Diagnosis of obstructive sleep apnea syndrome and its outcomes with home portable monitoring. *Chest* 2009;135(2):330-6.
- (9) Amir O, Barak-Shinar D, Amos Y, MacDonald M, Pittman S, White DP. An automated sleep-analysis system operated through a standard hospital monitor. *J Clin Sleep Med* 2010;6(1):59-63.
- (10) Candela A, Hernandez L, Asensio S, Sanchez-Paya J, Vila J, Benito N, et al. Validation of a respiratory polygraphy system in the diagnosis of sleep apnea syndrome. *Arch Bronconeumol* 2005;41(2):71-7.
- (11) Cheliout-Heraut F, Senny F, Djouadi F, Ouayoun M, Bour F. Obstructive sleep apnoea syndrome: comparison between polysomnography and portable sleep monitoring based on jaw recordings. *Neurophysiol Clin* 2011;41(4):191-8.
- (12) Driver HS, Pereira EJ, Bjerring K, Toop F, Stewart SC, Munt PW, et al. Validation of the MediByte(R) type 3 portable monitor compared with polysomnography for screening of obstructive sleep apnea. *Can Respir J* 2011;18(3):137-43.
- (13) Ferre A, Grau M, Jurado M, Romero O, Saheb A, Bartolome M, et al. Evaluation of a new simplified polysomnography system for the diagnosis of sleep disordered breathing [abstract]. *J Sleep Res* 2008;17(Suppl 1):234 (Abstract no. P441).

- (14) Goodrich S, Orr WC. An investigation of the validity of the Lifeshirt in comparison to standard polysomnography in the detection of obstructive sleep apnea. *Sleep Med* 2009;10(1):118-22.
- (15) Grant B. Diagnostic accuracy of home sleep studies for sleep apnea [abstract]. *Sleep* 2009;32(Suppl):A232 (Abstract no. 713).
- (16) Ng SS, Chan TO, To KW, Ngai J, Tung A, Ko FW, et al. Validation of Embletta portable diagnostic system for identifying patients with suspected obstructive sleep apnoea syndrome (OSAS). *Respirology* 2010;15(2):336-42.
- (17) Ng SS, Chan TO, To KW, Ngai J, Tung A, Ko FW, et al. Validation of a portable recording device (ApneaLink) for identifying patients with suspected obstructive sleep apnoea syndrome. *Intern Med J* 2009;39(11):757-62.
- (18) Nigro CA, Serrano F, Aimaretti S, Gonzalez S, Codinardo C, Rhodius E. Utility of ApneaLink for the diagnosis of sleep apnea-hypopnea syndrome. *Medicina (B Aires)* 2010;70(1):53-9.
- (19) Orr WC, Goodrich S. An investigation of the accuracy of the Lifeshirt in comparison to standard polysomnography [abstract]. *Sleep* 2006;29(Suppl):A348 (Abstract no. 1020).
- (20) Su S, Baroody FM, Kohrman M, Suskind D. A comparison of polysomnography and a portable home sleep study in the diagnosis of obstructive sleep apnea syndrome. *Otolaryngol Head Neck Surg* 2004;131(6):844-50.
- (21) Sullivan GE, Morehouse R, Savoy A. Comparison of synchronized level 1 and level 3 sleep studies [abstract]. *Vigilance* 2009;19(Suppl):(Abstract no. P074).
- (22) Takama N, Kurabayashi M. Effectiveness of a portable device and the need for treatment of mild-to-moderate obstructive sleep-disordered breathing in patients with cardiovascular disease. *J Cardiol* 2010;56(1):73-8.
- (23) To KW, Chan WC, Chan TO, Tung A, Ngai J, Ng S, et al. Validation study of a portable monitoring device for identifying OSA in a symptomatic patient population. *Respirology* 2009;14(2):270-5.
- (24) Yagi H, Nakata S, Tsuge H, Yasuma F, Noda A, Morinaga M, et al. Significance of a screening device (Apnomonitor 5) for sleep apnea syndrome. *Auris Nasus Larynx* 2009;36(2):176-80.

- (25) Alonso Alvarez MD, Santos JT, Guevara JC, Martinez MG, Pascual LR, Banuelos JL, et al. Reliability of home respiratory polygraphy for the diagnosis of sleep apnea-hypopnea syndrome: analysis of costs. *Archivos de Bronconeumologia* 2008;44(1):22-8.
- (26) Campbell AJ, Neill AM. Home set-up polysomnography in the assessment of suspected obstructive sleep apnea. *J Sleep Res* 2011;20(1 Pt 2):207-13.
- (27) Cilli A, Erogullari I, Turhan M, Ozbudak O, Ozdemir T, Dinc O. Comparison of Embletta portable device versus Embla for diagnosing the obstructive sleep apnea [abstract]. *J Sleep Res* 2006;15(Suppl 1):152.
- (28) Danzi-Soares NJ, Genta PR, Nerbass FB, Pedrosa RP, Soares FS, Cesar LA, et al. Obstructive sleep apnea is common among patients referred for coronary artery bypass grafting and can be diagnosed by portable monitoring. *Coron Artery Dis* 2012;23(1):31-8.
- (29) Finkel KJ, Searleman AC, Tymkew H, Tanaka CY, Saager L, Safer-Zadeh E, et al. Prevalence of undiagnosed obstructive sleep apnea among adult surgical patients in an academic medical center. *Sleep Med* 2009;10(7):753-8.
- (30) Fordyce L, Samuels CH, Oram C, Wallins B. A retrospective, observational study showing patients with a normal level III sleep study and normal OSA pretest probability factors may still require additional investigations [abstract]. *Vigilance* 2009;19(Suppl):(Abstract no. P075).
- (31) Furukawa T, Suzuki M, Funatogawa I, Isshiki T, Miyazawa Y, Teramoto T, et al. Screening method for severe sleep-disordered breathing in hypertensive patients without daytime sleepiness. *J Cardiol* 2009;53(1):79-85.
- (32) Gjevre JA, Taylor-Gjevre RM, Skomro R, Reid J, Fenton M, Cotton D. Comparison of polysomnographic and portable home monitoring assessments of obstructive sleep apnea in Saskatchewan women. *Can Respir J* 2011;18(5):271-4.
- (33) Hernandez L, Torrella M, Roger N, Llunell A, Ballester E, Quinto L, et al. Management of sleep apnea: concordance between nonreference and reference centers. *Chest* 2007;132(6):1853-7.
- (34) Masa JF, Corral J, Pereira R, Duran-Cantolla J, Cabello M, Hernandez-Blasco L, et al. Therapeutic decision-making for sleep apnea and hypopnea syndrome using home respiratory polygraphy: a large multicentric study. *Am J Respir Crit Care Med* 2011;184(8):964-71.

- (35) Masdeu MJ, Ayappa I, Hwang D, Mooney AM, Rapoport DM. Impact of clinical assessment on use of data from unattended limited monitoring as opposed to full-in lab PSG in sleep disordered breathing. *J Clin Sleep Med* 2010;6(1):51-8.
- (36) Quintana-Gallego E, Villa-Gil M, Carmona-Bernal C, Botbol-Benhamou G, Martinez-Martinez A, Sanchez-Armengol A, et al. Home respiratory polygraphy for diagnosis of sleep-disordered breathing in heart failure. *Eur Respir J* 2004;24(3):443-8.
- (37) Shrivastava D, Aurora NR, Gathoo M, Hardin K. Home diagnostic portable monitoring: an effective screening tool in a community-based primary care population [abstract]. *Sleep* 2006;29(Suppl):A192 (Abstract no. 565).
- (38) Skomro R, Cotton D, Gjevre J, Hill F, King L, Mink J, et al. Diagnosis of obstructive sleep apnea using unattended level III monitoring [abstract]. *Sleep* 2005;28(Suppl):A164 (Abstract no. 0483).
- (39) To KW, Chan WC, Chan TO, Ngai J, Tung A, Ng S, et al. Comparison of empirical continuous positive airway pressure (CPAP) treatment versus initial portable sleep monitoring followed by CPAP treatment for patients with suspected obstructive sleep apnoea. *Intern Med J* 2012;42(6):e107-e114.
- (40) Yin M, Miyazaki S, Ishikawa K. Evaluation of type 3 portable monitoring in unattended home setting for suspected sleep apnea: factors that may affect its accuracy. *Otolaryngol Head Neck Surg* 2006;134(2):204-9.
